# Supplementary material for: Assessing the sensitivity of aerosol mass budget and effective radiative forcing to horizontal grid spacing in E3SMv1 using a regional refinement approach
Source: Copernicus journal article supplement (doi:10.5194/gmd-17-1327-2024), 2024-02-15
Supplement: Supplementary file 1 [file gmd-17-1327-2024-supplement.pdf]

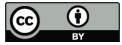

*Supplement of*

**Assessing the sensitivity of aerosol mass budget and effective radiative forcing to horizontal grid spacing in E3SMv1 using a regional refinement approach**

**Jianfeng Li et al.**

*Correspondence to:* Jianfeng Li ([jianfeng.li@pnnl.gov](mailto:jianfeng.li@pnnl.gov)) and Kai Zhang ([kai.zhang@pnnl.gov](mailto:kai.zhang@pnnl.gov))

The copyright of individual parts of the supplement might differ from the article licence.

13 Table S1. Evaluation statistics of aerosol optical depth (AOD) at 550 nm based on Figure S1

|     | MODIS <sup>1</sup> | LR    |       |      | RRM   |       |      |
|-----|--------------------|-------|-------|------|-------|-------|------|
|     | Mean <sup>2</sup>  | Mean  | RMSE  | r    | Mean  | RMSE  | r    |
| ANN | 0.159              | 0.130 | 0.084 | 0.66 | 0.130 | 0.084 | 0.66 |
| JJA | 0.164              | 0.149 | 0.098 | 0.72 | 0.149 | 0.099 | 0.72 |
| DJF | 0.162              | 0.130 | 0.092 | 0.68 | 0.129 | 0.093 | 0.68 |

14 <sup>1</sup>We use the level-3 MODIS (Moderate Resolution Imaging Spectroradiometer) gridded (1° × 1°) monthly Dark  
 15 Target AOD products (MOD08\_M3 and MYD08\_M3) in 2016 (Platnick et al., 2015). MOD08\_M3 provides  
 16 monthly mean AOD at 10:30 local solar time (LST), while MYD08\_M3 provides monthly mean AOD at 13:30  
 17 LST. The averages of monthly MOD08\_M3 and MYD08\_M3 AOD are used to calculate the MODIS annual, JJA  
 18 (June, July, and August), and DJF (December, January, and February) mean AOD all over the globe in Figure S1,  
 19 which are then used to derive the statistics here.

20 <sup>2</sup>“Mean” refers to the global mean; RMSE (root-mean-square-error) and r (Pearson correlation coefficient) are  
 21 against MODIS observations.

22

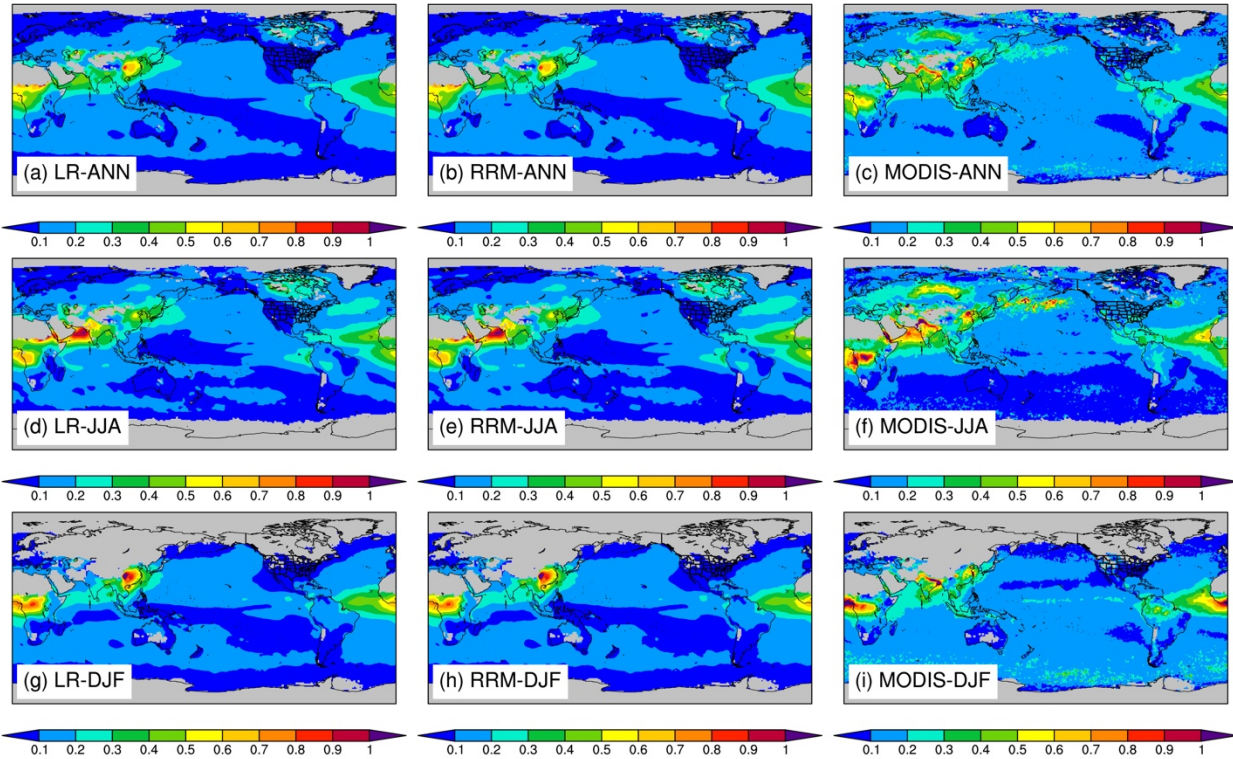

23  
 24 Figure S1. Spatial distributions of AOD at 550 nm from the (a, d, g) LR and (b, e, h) RRM simulations  
 25 and (c, f, i) the MODIS datasets in 2016. (a, b, c) ANN refers to the annual mean, (d, e, f) JJA indicates  
 26 the mean AOD during June, July, and August, and (g, h, i) represents the mean during December,  
 27 January, and February. For the LR and RRM simulations, we output averaged AOD during 10:00-11:00  
 28 LST and 13:00-14:00 LST each day to match MOD and MYD observations, respectively. Calculated  
 29 monthly AOD during the two periods from the LR and RRM simulations are then filtered using the  
 30 corresponding data availability of MOD08\_M3 and MYD08\_M3 AOD at 550 nm, which are then used to  
 31 calculate averaged AOD of the two periods). Finally, we use the monthly averaged AOD to calculate the  
 32 annual, JJA, and DJF mean AOD for the LR and RRM simulations and the MODIS datasets.

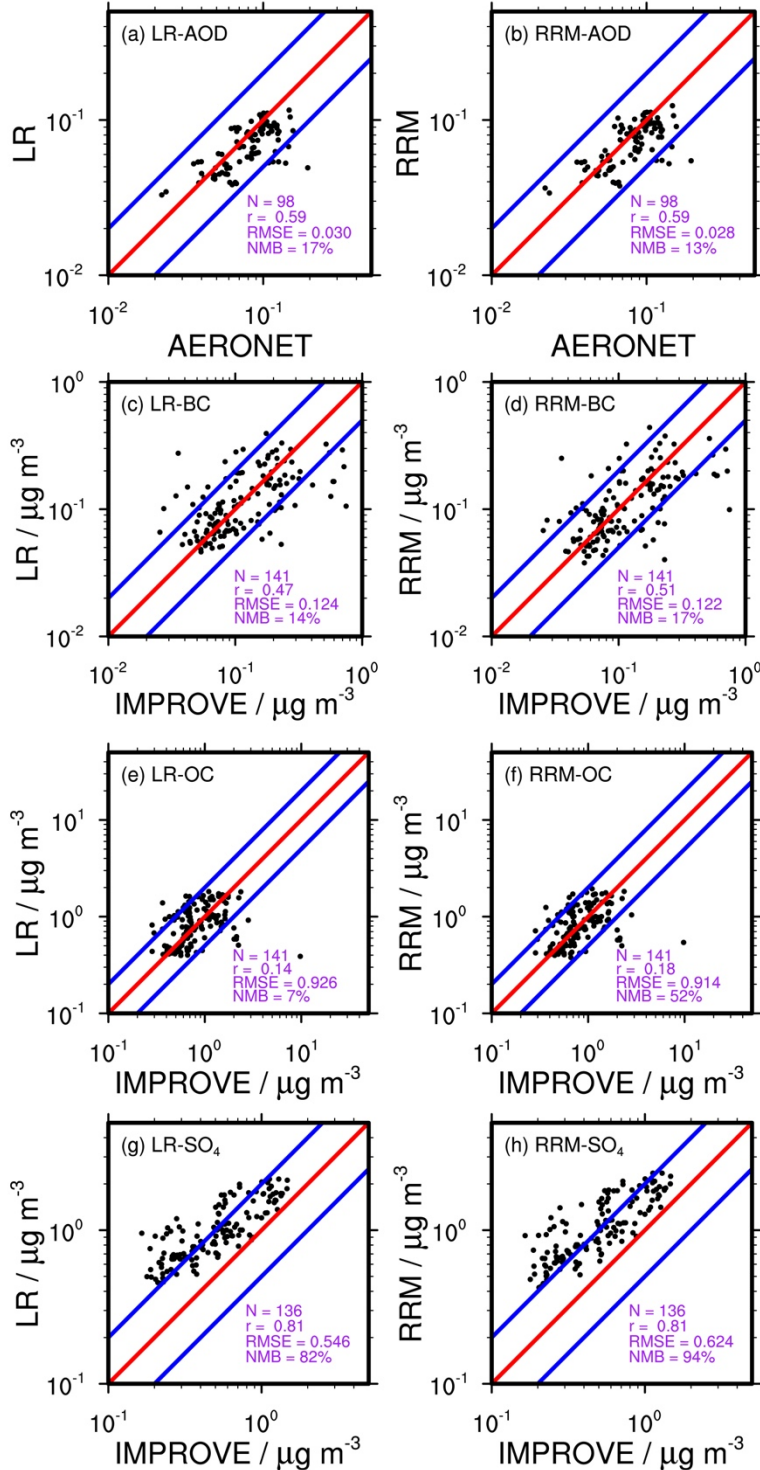

33  
 34 Figure S2. Evaluations of the (left column) LR and (right column) RRM simulated annual mean (a, b)  
 35 AOD at 550 nm and fine (c, d) BC, (e, f) organic carbon (OC), and (g, h) SO<sub>4</sub> mass concentrations against  
 36 ground-based observations from AERONET (AERosol RObotic NETwork) and IMPROVE (Interagency  
 37 Monitoring of Protected Visual Environments) (Malm et al., 1994) in the RRM region in 2016.  
 38 AERONET V3 level 2.0 provides daily mean AOD at 500 nm and daily mean Angstrom exponent for  
 39 440-870 nm (Slutsker, 2018), which are used to derive daily mean AOD at 550 nm. IMPROVE provides  
 40 daily mean mass concentrations of fine BC, OC, and SO<sub>4</sub> (Cira/Csu, 2023). The daily mean observations

41 are used to calculate monthly means, which are then used to select coincident model monthly results.  
42 Notably, we use the regridded ( $1^\circ \times 1^\circ$ ) LR and RRM simulation results to match observational sites to  
43 make the comparisons fair to both simulations. Each dot in the figure denotes one observational site. “N”  
44 refers to the number of observational sites; “r” is the Pearson correlation coefficient; “RMSE” is the root  
45 mean square error; and “NMB” indicates the normalized mean bias.  
46 We apply the following equations to calculate the model fine BC, OC, and  $\text{SO}_4$  to be compared with  
47 observations.  
48  $\text{SO}_4(\text{fine}) = \text{SO}_4(\text{accumulation mode}) + \text{SO}_4(\text{Aitken mode}) + \text{Sea salt}(\text{accumulation}) + \text{Sea salt}(\text{Aitken})$   
49  $\text{OC}(\text{fine}) = (\text{POM}(\text{primary carbon}) + \text{POM}(\text{accumulation}) + \text{SOA}(\text{accumulation}) + \text{SOA}(\text{Aitken}))/1.4$   
50  $\text{BC}(\text{fine}) = \text{BC}(\text{accumulation}) + \text{BC}(\text{primary carbon})$   
51

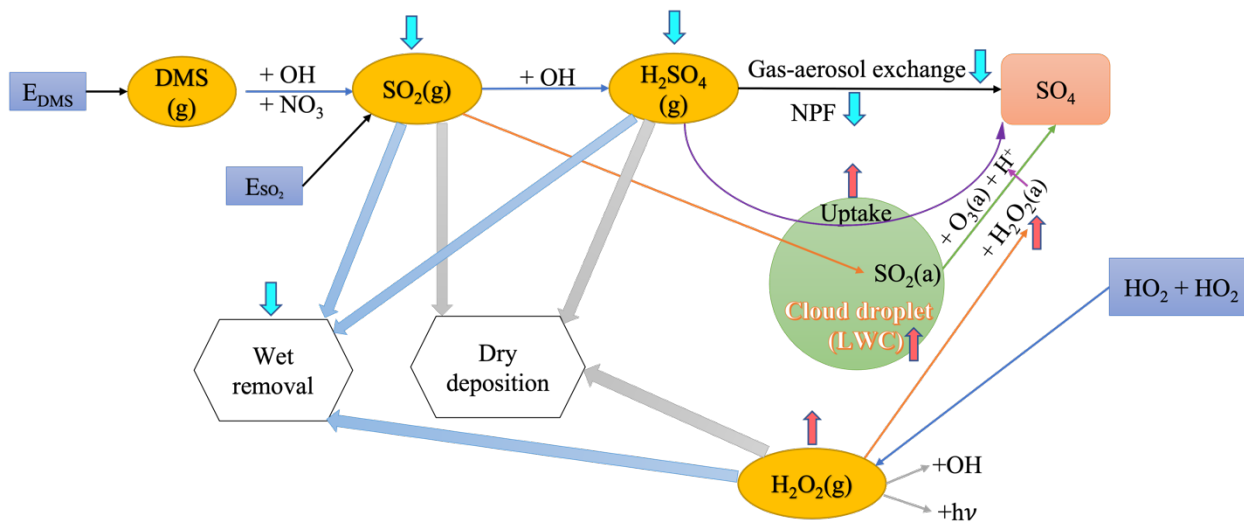

52  
 53 Figure S3. Schematic of the impact of RRM on sulfur chemistry. Red upward arrows indicate  
 54 enhancement by RRM, while cyan downward arrows denote reduction by RRM.  
 55

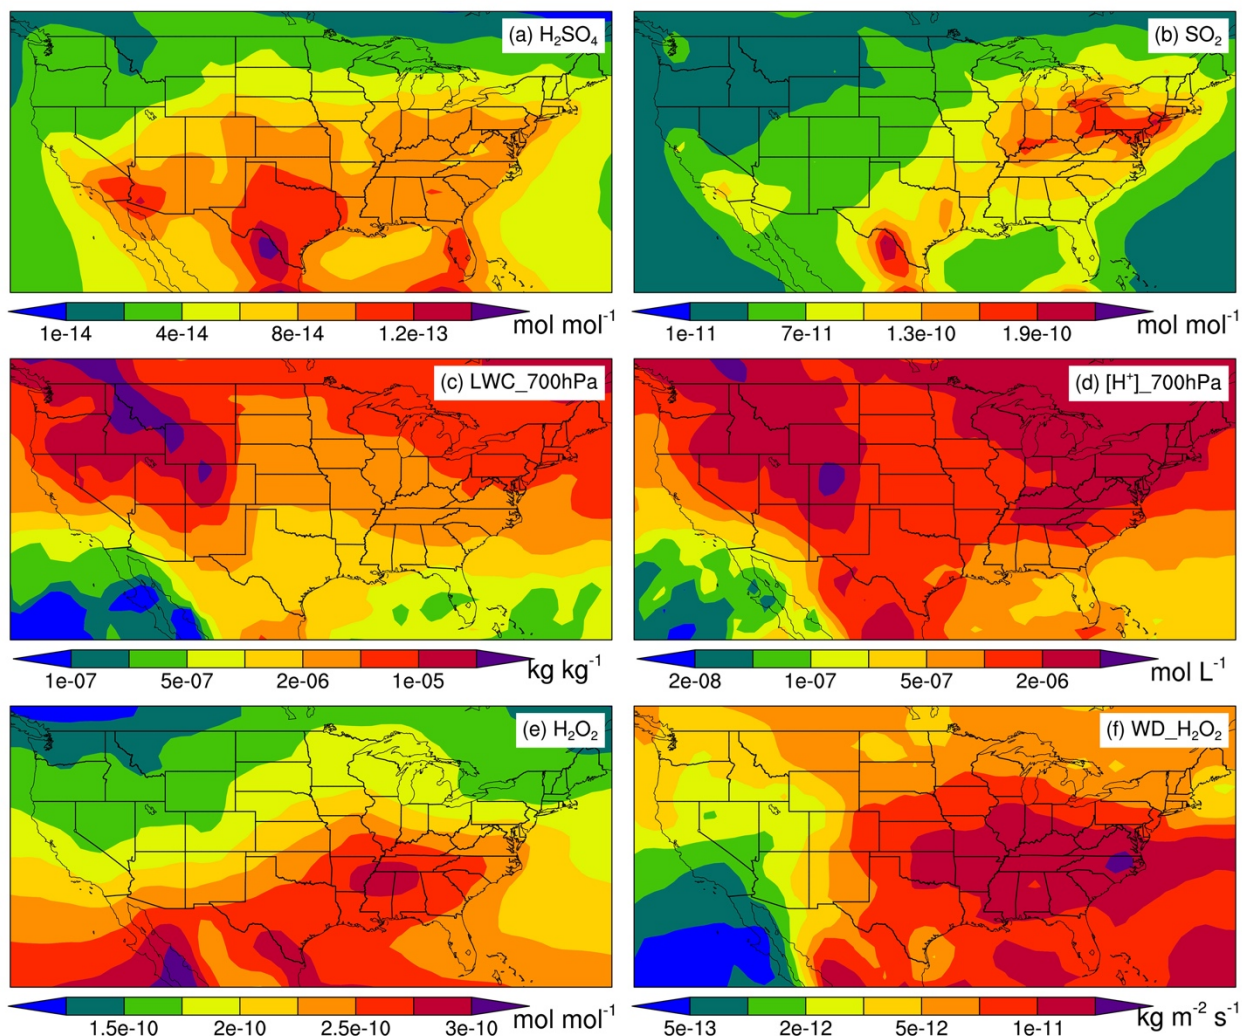

56  
 57 Figure S4. Spatial distributions of the annual mean (a) vertical-integrated gas-phase  $\text{H}_2\text{SO}_4$   
 58 concentrations, (b) vertical-integrated gas-phase  $\text{SO}_2$  concentrations, (c) large-scale cloud liquid water  
 59 content at 700 hPa ( $\text{kg}_{\text{water}} \text{kg}_{\text{air}}^{-1}$ ), (d)  $\text{H}^+$  concentrations in large-scale cloud liquid water at 700 hPa, (e)  
 60 vertical-integrated gas-phase  $\text{H}_2\text{O}_2$  concentrations, and (f) wet deposition fluxes of gas-phase  $\text{H}_2\text{O}_2$  from  
 61 the LR simulation.  
 62

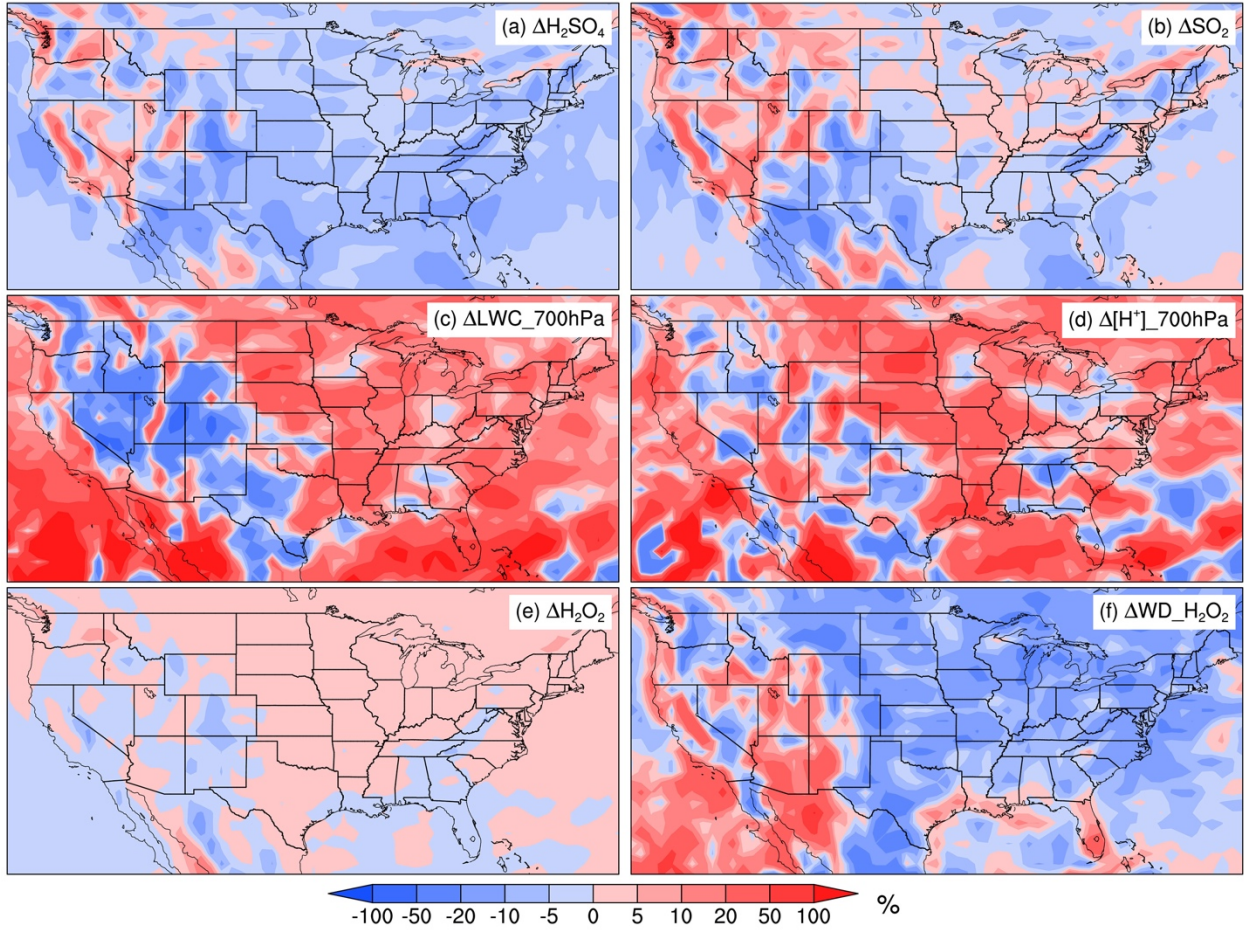

63  
64  
65

Figure S5. The same as Figure S2 but for the relative differences between the RRM and LR simulations.



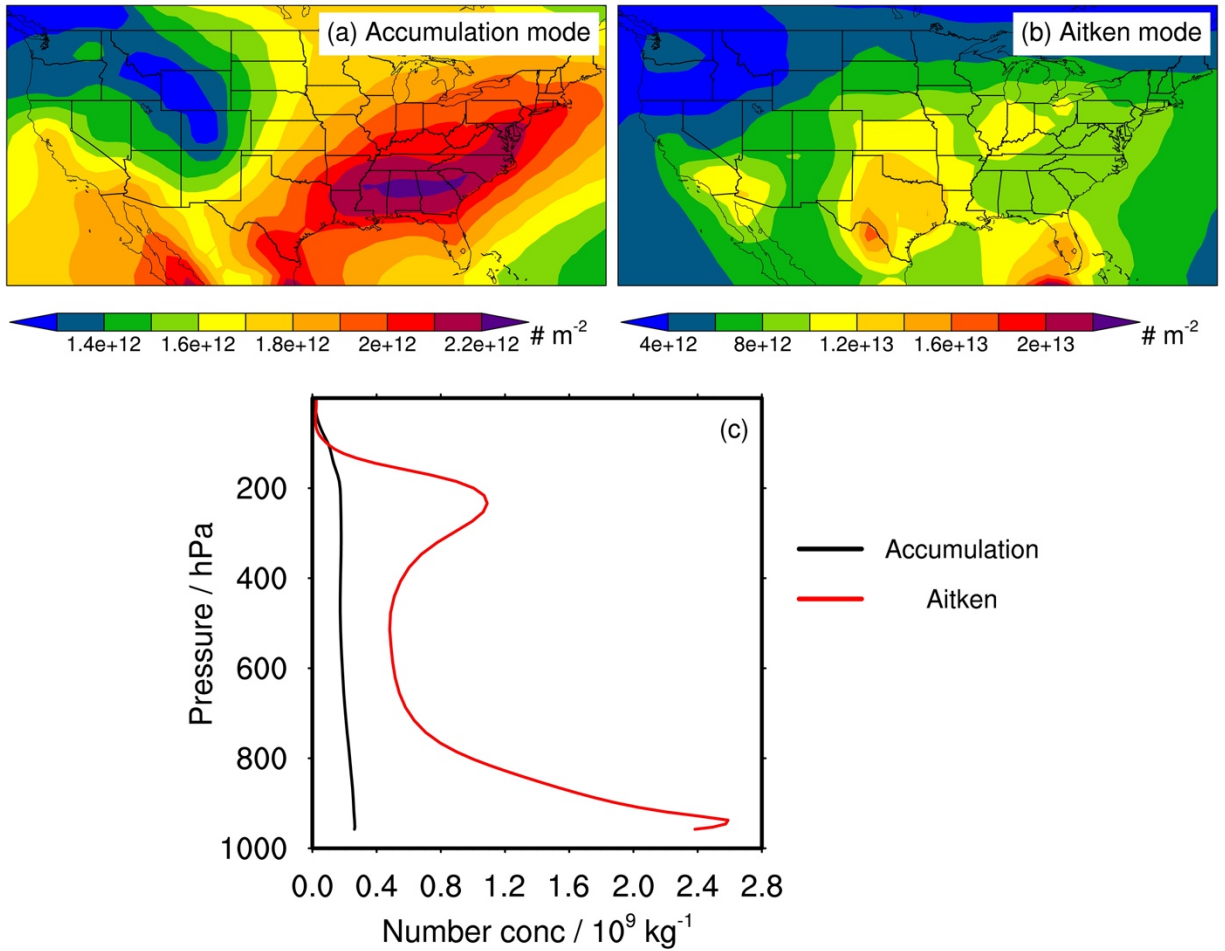

66  
 67 Figure S6. (a, b) Spatial distributions of annual mean vertical-integrated IAP number concentrations ( $\text{# m}^{-2}$ ) for (a) accumulation and (b) Aitken modes from the LR simulation. (c) Vertical profiles of annual  
 68 regional mean IAP number concentrations ( $10^9 \text{ kg}_{\text{air}}^{-1}$ ) for accumulation and Aitken modes from the LR  
 69 simulation.  
 70  
 71

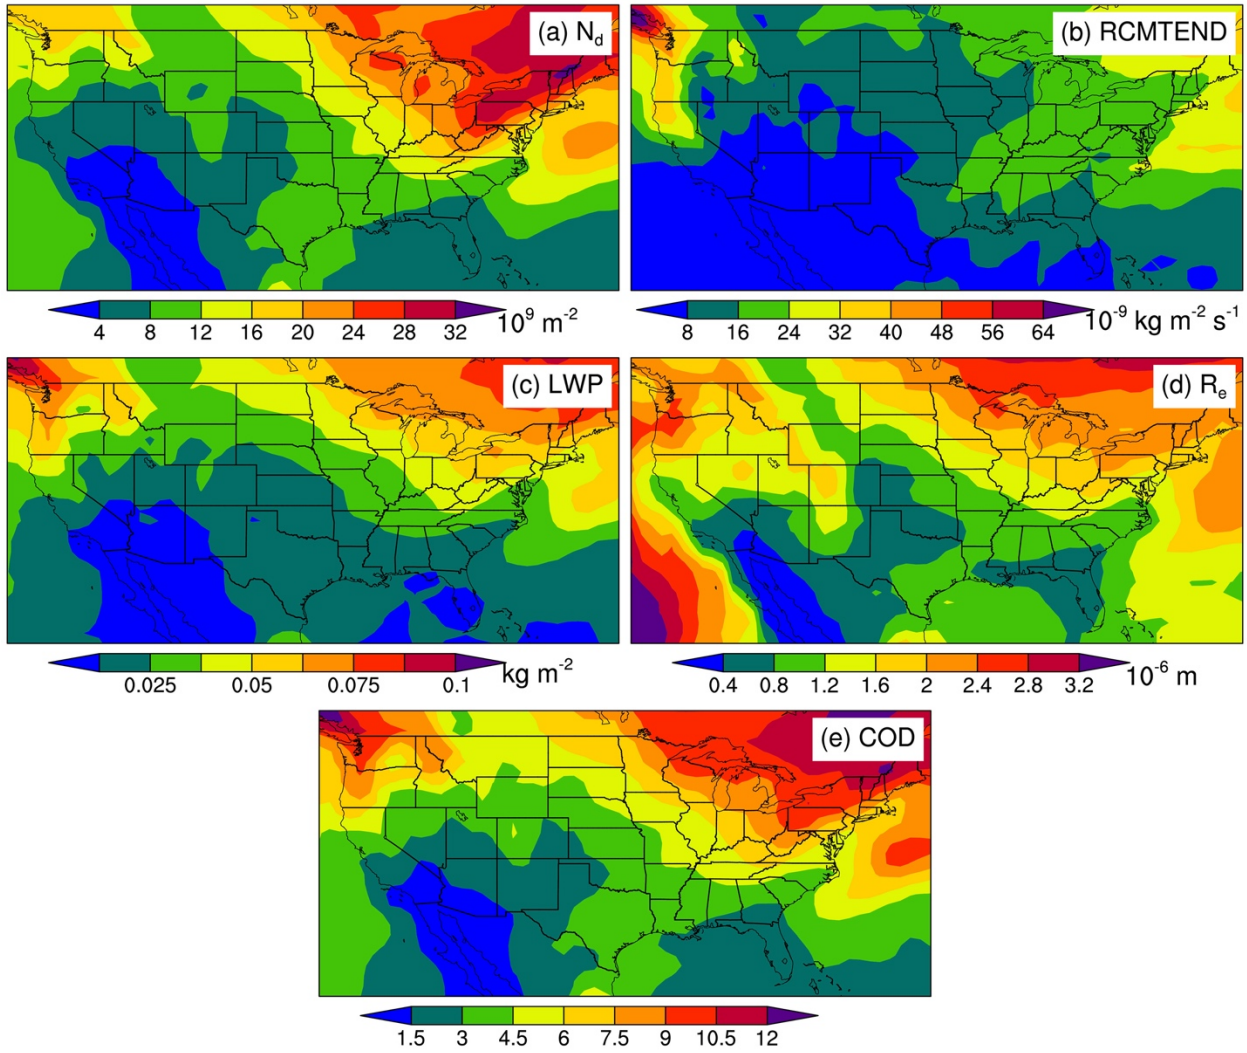

72  
73  
74

Figure S7. Same as Figure 12 but for the LR simulation results.

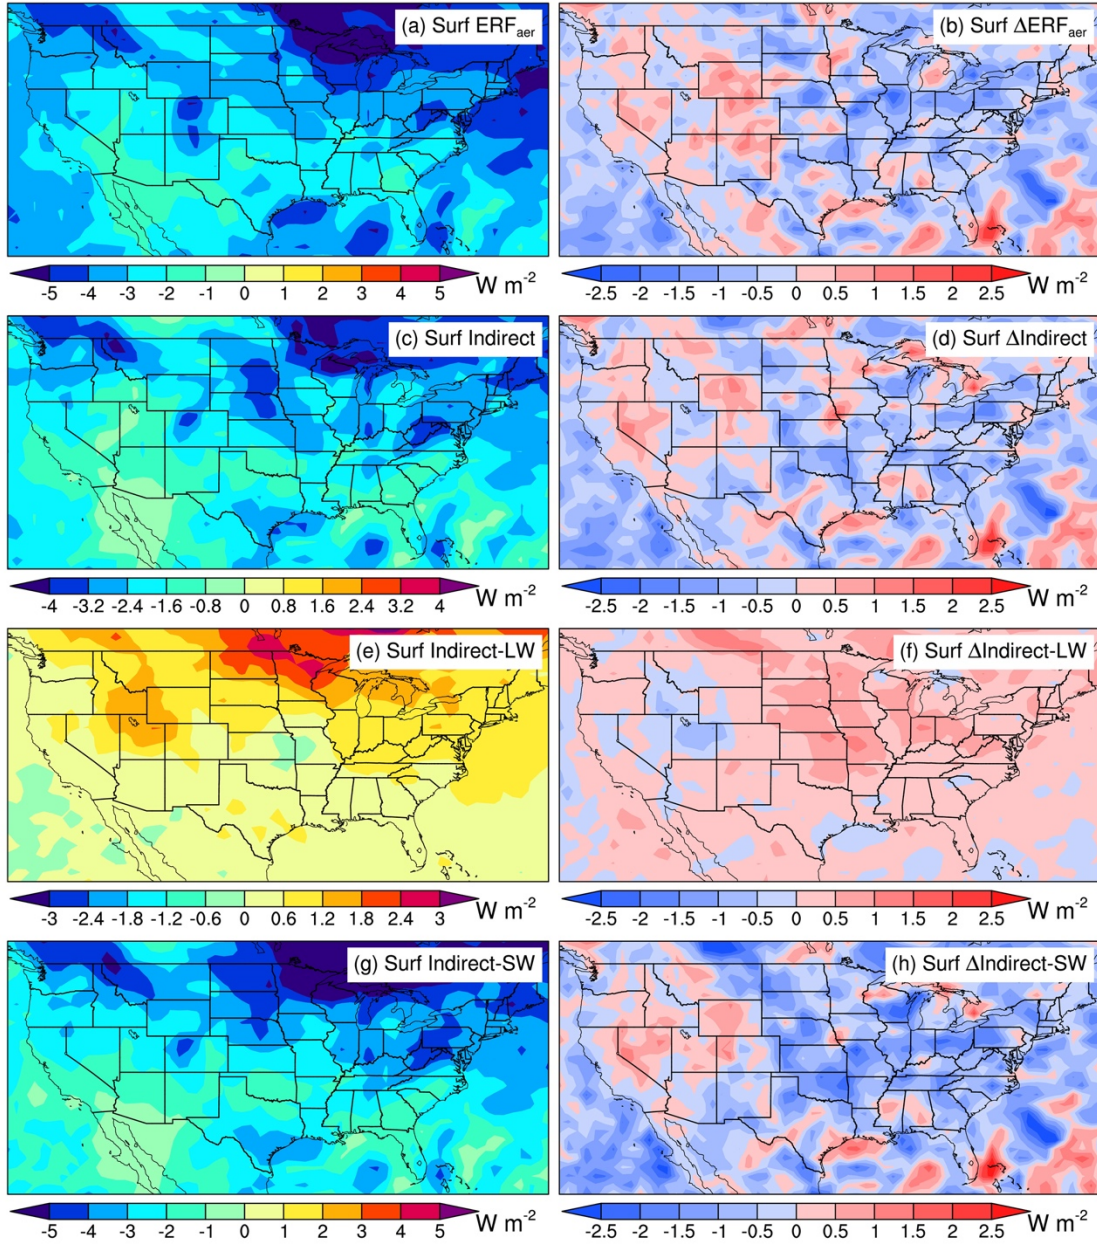

75  
76  
77

Figure S8. Same as Figure 13 but for surface ERF<sub>aer</sub>.

## 78 **References**

- 79 CIRA/CSU: IMPROVE Data, Federal Land Manager Environmental Database [dataset],  
80 <https://views.cira.colostate.edu/fed/QueryWizard/>, 2023 (last access: May 26, 2022).
- 81 Malm, W. C., Sisler, J. F., Huffman, D., Eldred, R. A., and Cahill, T. A.: Spatial and seasonal trends in  
82 particle concentration and optical extinction in the United States, *Journal of Geophysical Research:*  
83 *Atmospheres*, 99, 1347-1370, <https://doi.org/10.1029/93JD02916>, 1994.
- 84 Platnick, S., King, M., and Hubanks, P.: MODIS Atmosphere L3 Monthly Product, NASA MODIS  
85 Adaptive Processing System, Goddard Space Flight Center [dataset],  
86 [https://doi.org/10.5067/MODIS/MOD08\\_M3.061](https://doi.org/10.5067/MODIS/MOD08_M3.061) (MOD08\_M3) and  
87 [https://doi.org/10.5067/MODIS/MYD08\\_M3.061](https://doi.org/10.5067/MODIS/MYD08_M3.061) (MYD08\_M3), 2015 (last access: Nov 28, 2023).
- 88 Slutsker, I.: Aerosol Robotic Network, Goddard Space Flight Center [dataset],  
89 [https://aeronet.gsfc.nasa.gov/new\\_web/download\\_all\\_v3\\_aod.html](https://aeronet.gsfc.nasa.gov/new_web/download_all_v3_aod.html), 2018 (last access: May 26, 2022).
- 90
